# Supplementary material for: Single Versus Multiple Doses of Tocilizumab in Critically Ill Patients with Coronavirus Disease 2019 (COVID-19): A Two-center, Retrospective Cohort Study
Source: Research Square preprint supplement (doi:10.21203/rs.3.rs-526150/v2), 2021-05-18
Supplement: Supplementary file 1 [file 28e3709dfa471039cc3c5072.docx]

**Table 1 Summary of Demography and Baseline characteristics**

|  | **Overall**  **(261)** | **Single-dose  (N=189)** | **Multiple-dose (N=72)** | **P-value** |
| --- | --- | --- | --- | --- |
| **Age (Years), Mean (SD)** | 59.2 (12.67) | 59.7 (12.79) | 57.8 (12.35) | 0.2925* |
| **Gender – Male, , n (%)** | 196 ( 76.3 ) | 143 ( 76.9 ) | 53 ( 74.6 ) | 0.7066^^ |
| **Gender - Female, n (%)** | 61 ( 23.7 ) | 43 ( 23.1 ) | 18 ( 25.4 ) |
| **Weight (kg), Mean (SD)** | 80.0 (71.00, 92.50) | 81.7 (73.00, 95.00) | 80.0 (70.00, 86.00) | 0.0431^ |
| **BMI, Mean (SD)** | 31.0 (7.49) | 31.6 (7.92) | 29.5 (6.02) | 0.0267^ |
| **GCS Baseline, Median (IQR)** | 15.0 (15.00, 15.00) | 15.0 (15.00, 15.00) | 15.0 (15.00, 15.00) | 0.4138^ |
| **APACHE II score, Median (IQR)** | 12.0 (7.00, 22.00) | 12.0 (8.00, 19.00) | 15.0 (7.00, 28.00) | 0.3414^ |
| **SOFA score, Median (IQR)** | 4.0 (3.00, 7.00) | 4.0 (2.00, 7.00) | 4.0 (3.00, 7.00) | 0.6069^ |
| **Systemic Corticosteroids use during ICU, n (%)** | 240 ( 93.0 ) | 171 ( 91.4 ) | 69 ( 97.2 ) | 0.1061** |
| **Serum creatinine, Median (IQR)** | 86.5 (69.00, 125.00) | 87.0 (67.00, 125.00) | 86.0 (73.00, 125.00) | 0.4121^ |
| **Acute Kidney Injury (AKI) Within 24 hours of ICU admission, n (%)** | 64 ( 24.8 ) | 42 ( 22.5 ) | 22 ( 31.0 ) | 0.1567^^ |
| **MV during ICU stay within 24hr, n (%)** | 176 ( 68.5 ) | 126 ( 67.4 ) | 50 ( 71.4 ) | 0.5340^^ |
| **Lactic acid Baseline, Median (IQR)** | 1.9 (1.40, 2.72) | 1.8 (1.34, 2.53) | 2.2 (1.51, 13.60) | 0.0027^ |
| **Platelets count Baseline, Median (IQR)** | 256.0 (201.00, 323.50) | 265.0 (200.00, 330.00) | 250.0 (204.00, 300.00) | 0.1495^ |
| **Total WBC Baseline, Median (IQR)** | 9.3 (6.76, 14.00) | 9.1 (6.83, 13.00) | 9.7 (6.57, 14.43) | 0.8427^ |
| **activated partial thromboplastin time (aPTT) Baseline, Median (IQR)** | 29.6 (27.00, 32.60) | 29.3 (27.00, 32.30) | 31.0 (27.00, 32.80) | 0.1803^ |
| **Total bilirubin, Median (IQR)** | 10.2 (7.30, 14.00) | 10.3 (7.80, 14.30) | 10.0 (7.00, 13.70) | 0.4236^ |
| **Alanine aminotransferase (ALT) Baseline, Median (IQR)** | 40.0 (26.00, 64.00) | 38.0 (25.00, 61.00) | 43.0 (31.00, 70.00) | 0.0744^ |
| **Aspartate aminotransferase (AST)  Baseline, Median (IQR)** | 54.0 (36.00, 76.00) | 51.5 (36.00, 73.00) | 58.5 (38.00, 83.00) | 0.1509^ |
| **Albumin Baseline, Median (IQR)** | 34.0 (30.00, 36.00) | 33.0 (30.00, 36.00) | 35.1 (31.00, 39.00) | 0.0077^ |
| **Blood urea nitrogen (BUN) Baseline, Median (IQR)** | 6.9 (4.70, 12.10) | 7.0 (4.70, 11.50) | 6.9 (4.30, 16.30) | 0.7781^ |
| **CPK (U/l), Median (IQR)** | 231.5 (78.00, 562.00) | 246.0 (85.00, 587.00) | 172.0 (69.00, 554.00) | 0.2387^ |
| **CRP (mg/l)m Median (IQR)** | 167.0 (112.00, 248.00) | 164.5 (112.00, 267.00) | 169.0 (117.00, 217.00) | 0.4492^ |
| **Procalcitonin (ng/ml), Median (IQR)** | 0.3 (0.15, 1.03) | 0.4 (0.17, 1.03) | 0.3 (0.13, 1.28) | 0.5595^ |
| **Fibrinogen Level (gm/l), Median (IQR)** | 6.0 (4.64, 7.36) | 5.8 (4.51, 7.32) | 6.4 (4.76, 8.31) | 0.0747* |
| **Bicarbonate (CO2) Baseline, Median (IQR)** | 21.5 (19.00, 24.00) | 21.8 (19.00, 24.00) | 21.0 (19.00, 24.00) | 0.8081^ |
| **Chloride (CL), Median (IQR)** | 102.0 (99.00, 105.50) | 102.0 (99.00, 106.00) | 101.5 (98.90, 104.00) | 0.3275^ |
| **Potassium Baseline, Median (IQR)** | 4.2 (3.75, 4.80) | 4.2 (3.70, 4.70) | 4.2 (3.90, 5.10) | 0.1717^ |
| **Sodium baseline, Median (IQR)** | 137.0 (135.00, 140.00) | 137.0 (135.00, 140.00) | 137.0 (134.00, 139.00) | 0.2897^ |
| **Hematocrit (Hct) , Median (IQR)** | 0.4 (0.37, 0.46) | 0.4 (0.36, 0.45) | 0.5 (0.39, 37.50) | <0.0001^ |
| **Glu2 Baseline Within 24 hours of ICU admission, Median (IQR)** | 11.2 (7.60, 16.80) | 10.9 (7.50, 16.30) | 12.2 (7.90, 18.20) | 0.3370^ |
| **PaO2/FiO2 ratio within 24 hours of admission, Median (IQR)** | 76.0 (60.00, 108.40) | 75.0 (61.20, 107.00) | 76.3 (52.63, 136.30) | 0.8323^ |
| **Highest Heart Rate (HR) Baseline, Median (IQR)** | 104.0 (91.00, 115.00) | 105.0 (93.00, 115.00) | 100.0 (88.00, 115.00) | 0.0894^ |
| **Maximum body temperature Baseline** | 37.5 (37.05, 38.40) | 37.4 (37.10, 38.30) | 38.0 (37.00, 38.60) | 0.1815^ |
| **History of Hospitalization within 1 year, n (%)** | 19 ( 7.4 ) | 18 ( 9.7 ) | 1 ( 1.4 ) | 0.0235^^ |
| **History of invasive procedure (Surgery) within 1 year, n (%)** | 6 ( 2.3 ) | 6 ( 3.2 ) | 0 ( 0.0 ) | 0.1267** |
| **CRE History within 1 year, n (%)** | 2 ( 0.8 ) | 1 ( 0.5 ) | 1 ( 1.4 ) | 0.4775** |
| **Antibiotics Exposure in last 3 months, n (%)** | 29 ( 11.4 ) | 24 ( 13.0 ) | 5 ( 7.1 ) | 0.1906^^ |
| *T Test / ^ Wilcoxon rank sum test is used to calculate the P-value.  PS: Propensity score  ^^ Chi square/ ** Fisher’s Exact teat is used to calculate P-value. | | | | | |
